# Supplementary material for: Extracorporeal shockwave therapy versus sham extracorporeal shockwave therapy for chronic Achilles tendinopathy: a meta-analysis of randomized controlled trials
Source: PeerJ. 2026 Jan 6;14:e20506. doi: 10.7717/peerj.20506 (PMC12786123; doi:10.7717/peerj.20506)
Supplement: Supplemental Information 1 [file peerj-14-20506-s001.xlsx]

## Sheet: VAS
		Δ VAS at 1-month
		ESWT						Control
First author	Year	Baseline	n	1 month	n	Δ	n	Baseline	n	1 month	n	Δ	n
Rasmussen	2008	3.8±2.51	24	2.5±2.23	24	-1.5 ± 2.13	24	3.0±2.33	24	2.2±3.09	23	-0.8±2.21	23
Vahdatpour	2018	7.55±1.76	22	3.85±3.05	22	-3.7±2.21	22	7.70±1.34	21	4.45±1.77	21	-3.25±1.37	21
Pinitkwamdee	2020	6.0±2.6	16	3.0±2.43	16	-3±2.46	16	5.2±2.2	15	3.7±3.65	15	-1.5±2.63	15
Mansur	2021	5.69±2.21	58	4.11±3.36	50	-1.58±2.4	50	5.62±2.18	61	4.17±3.01	58	-1.45±2.15	58
Abdelkader	2021	7.9±1.9	25	3.5±3.1	25	-4.4±2.51	25	8.1±2.0	25	4.6±3.7	25	-3.5±2.76	25
Alsulaimani	2024	3.1±2	38	2.7±1.9	36	-0.4±2.05	36	3.7±2.1	38	3.2±3.0	33	-0.5±2.15	33
		Δ VAS at 3-month
		ESWT						Control
First author	Year	Baseline	n	3 month	n	Δ	n	Baseline	n	3 month	n	Δ	n
Costa	2005	5.55±3.06	22	3.45±4.55	22	-2.1±3.25	22	5.56±2.65	27	5.03±4.50	27	-0.53±3.25	27
Rasmussen	2008	3.8±2.51	24	1.4±2.62	22	-2.4±1.99	22	3.0±2.33	24	2.1±1.75	23	-0.9±1.9	23
Vahdatpour	2018	7.55±1.76	22	5.15±2.77	22	-4.55±2.17	22	7.70±1.34	21	4.30±2.28	21	-3.4±1.65	21
Pinitkwamdee	2020	6.0±2.6	16	2.3±2.17	16	-3.7±2.55	16	5.2±2.2	15	2.3±1.38	15	-2.9±2.42	15
Mansur	2021	5.69±2.21	58	3.52±3.22	39	-2.17±2.3	39	5.62±2.18	61	2.89±2.08	43	-2.73±2.2	43
Alsulaimani	2024	3.1±2	38	2.8±2.3	37	-0.3±2.17	37	3.7±2.1	38	2.9±2.2	36	-0.8±2.27	36
		Δ VAS at 6-month
		ESWT						Control
		Baseline	n	6 month	n	Δ	n	Baseline	n	6 month	n	Δ	n
Pinitkwamdee	2020	6.0±2.6	16	2.80±2.19	16	-3.2±3.01	16	5.2±2.2	15	2.0±1.78	15	-3.2±2.42	15
Mansur	2021	5.69±2.21	58	2.71±2.50	45	-2.98±2.51	45	5.62±2.18	61	2.46±2.09	51	-3.16±2.21	51
		Δ VAS at over 6-month
		ESWT						Control
		Baseline	n	over 6 month	n	Δ	n	Baseline	n	over 6 month	n	Δ	n
Costa	2005	5.55±3.06	22	2.73±2.59	20	-2.82±3.06	20	5.56±2.65	27	3.51±3.31	23	-2.05±3.1	23
Abdelkader	2021	7.9±1.9	25	4.3±3.3	25	-3.6±2.71	25	8.1±2.0	25	5.0±3.8	25	-3.1±2.76	25

## Sheet: VISA-A
		Δ VISA-A at 1-month
		ESWT						Control
First author	Year	Baseline	n	1 month	n	Δ	n	Baseline	n	1 month	n	Δ	n
Gatz	2021	65.23±12.21	21	79.83±15.98	21	14.6±11.46	21	61.73±17.32	21	68.53±7.69	21	6.8±13.14	21
Mansur	2021	43.9±23.2	58	50.2±19.6	50	6.3±21.62	50	40.6±21.1	61	52.9±20.6	58	12.3±20.85	58
Alsulaimani	2024	44.8±15.1	38	61.3±18.13	36	16.5±13.17	36	49.4±15.1	38	59.9±21.0	33	10.5±15	33
		Δ VISA-A at 3-month
		ESWT						Control
First author	Year	Baseline	n	3 month	n	Δ	n	Baseline	n	3 month	n	Δ	n
Mansur	2021	43.9±23.2	58	53.7±22.0	39	19.8±22.62	39	40.6±21.1	61	61.8±23.2	42	21.2±22.22	42
Alsulaimani	2024	44.8±15.1	38	67.0±17.39	37	22.2±12.76	37	49.4±15.1	38	65.5±20.44	36	16.1±14.62	36
		Δ VISA-A at 6-month
		ESWT						Control
First author	Year	Baseline	n	6 month	n	Δ	n	Baseline	n	6 month	n	Δ	n
Gatz	2021	65.23±12.21	21	86.03±15.40	21	20.8±11.09	21	61.73±17.32	21	79.13±6.78	21	17.4±11.6	21
Mansur	2021	43.9±23.2	58	63.2±27.5	45	19.3±25.62	45	40.6±21.1	61	62.3±25.1	51	21.7±23.36	51

## Sheet: AOFAS
		Δ AOFAS at 1-month
		ESWT						Control
First author	Year	Baseline	n	1 month	n	Δ	n	Baseline	n	1 month	n	Δ	n
Rasmussen	2008	70±6.8	24	80.7±11.88	24	10.7±8.62	24	74±12	24	79.7±14.32	23	5.7±11.67	23
Vahdatpour	2018	64.95±14.23	22	82.00±8.50	22	17.05±12.4	22	64.40±11.96	21	79.15±6.69	21	14.75±10.38	21
Mansur	2021	64.1±15.0	58	73.1±12.0	50	9±13.75	50	64.7±13.4	61	74.3±12.3	58	9.6±12.88	58
Gatz	2021	76.4±5.32	21	81.9±11.09	21	5.5±8.29	21	75.3±6.21	21	77.6±13.00	21	2.3±9.72	21
		Δ AOFAS at 3-month
		ESWT						Control
First author	Year	Baseline	n	3 month	n	Δ	n	Baseline	n	3 month	n	Δ	n
Rasmussen	2008	70±6.8	24	88.0±12.16	22	18±8.85	22	74±12	24	81.0±16.0	23	7±14.42	23
Vahdatpour	2018	64.95±14.23	22	85.85±7.88	22	20.09±12.35	22	64.40±11.96	21	79.50±7.53	21	15.1±10.47	21
Mansur	2021	64.1±15.0	58	75.4±13.7	39	11.3±14.4	39	64.7±13.4	61	80.1±12.8	43	15.4±13.11	43
		Δ AOFAS at 6-month
		ESWT						Control
First author	Year	Baseline	n	6 month	n	Δ	n	Baseline	n	6 month	n	Δ	n
Mansur	2021	64.1±15.0	58	79.7±17.9	45	15.6±16.64	45	64.7±13.4	61	82.0±15.6	51	17.3±14.62	51
Gatz	2021	76.4±5.3	21	86.9±13.24	21	10.5±10.25	21	75.3±6.21	21	84.1±14.96	21	8.8±11.5	21

## Sheet: Adverse events
		ESWT		Control
First author	Year	Events	Total	Events	Total
Costa	2005	2	22	0	27
Vahdatpour	2018	0	22	0	21
Pinitkwamdee	2020	4	16	0	15
Mansur	2021	0	58	0	61
Alsulaimani	2024	1	38	2	38
